# Supplementary material for: The effect of electron-withdrawing substituents in asymmetric anthracene derivative semiconductors
Source: Royal Society of Chemistry journal article supplement (doi:10.1039/d0tc05824f), 2021-01-01
Supplement: d0tc05824f1.pdf [file d0tc05824f1.pdf]

## The effect of electron withdrawing substituent in asymmetric anthracene derivative semiconductors

Si Liu,<sup>†a</sup> Lei Zheng,<sup>†a</sup> Mingxi Chen,<sup>a</sup> Yajing Sun,<sup>a</sup> Peng Wang,<sup>a</sup> Shuyu Li,<sup>a</sup> Hongnan Wu,<sup>a</sup> Xiaotao Zhang<sup>\*a</sup> and Wenping Hu<sup>a, b</sup>

<sup>a</sup>*Tianjin Key Laboratory of Molecular Optoelectronic Sciences, Tianjin University, Tianjin 300072, China*

<sup>b</sup>*Joint School of National University of Singapore and Tianjin University, International Campus of Tianjin University, Binhai New City, Fuzhou 350207, China.*

### Contents

Table S1 Crystal data and structure refinement of TZ-Ant and F<sub>5</sub>Ph-Ant.

Figure S1 Comparison of molecular packing for Ph-Ant, TZ-Ant and F<sub>5</sub>Ph-Ant.

Figure S2 Atomic force microscopy image of a thin film of Ph-Ant and TZ-Ant in the tapping mode and transfer characteristics of devices based on Ph-Ant and TZ-Ant.

Figure S3 Single crystal based transistor of TZ-Ant and transfer characteristics of devices based on TZ-Ant.

Table S1. Crystal data and structure refinement of TZ-Ant and F<sub>5</sub>Ph-Ant. (CCDC No. 2033809, 2033782.)

| Compound                                    | TZ-Ant                                                      | F <sub>5</sub> Ph-Ant                                       |
|---------------------------------------------|-------------------------------------------------------------|-------------------------------------------------------------|
| Empirical formula                           | C <sub>17</sub> H <sub>11</sub> NS                          | C <sub>20</sub> H <sub>9</sub> F <sub>5</sub>               |
| Formula weight                              | 261.33                                                      | 344.27                                                      |
| Temperature/K                               | 293(2)                                                      | 293(2)                                                      |
| Crystal system                              | orthorhombic                                                | orthorhombic                                                |
| Space group                                 | Pna2 <sub>1</sub>                                           | Pna2 <sub>1</sub>                                           |
| a/Å                                         | 24.3454(3)                                                  | 12.26360(10)                                                |
| b/Å                                         | 8.44650(10)                                                 | 15.4509(2)                                                  |
| c/Å                                         | 6.09350(10)                                                 | 7.56040(10)                                                 |
| α/°                                         | 90                                                          | 90                                                          |
| β/°                                         | 90                                                          | 90                                                          |
| γ/°                                         | 90                                                          | 90                                                          |
| Volume/Å <sup>3</sup>                       | 1253.03(3)                                                  | 1432.57(3)                                                  |
| Z                                           | 4                                                           | 4                                                           |
| ρ <sub>calc</sub> g/mm <sup>3</sup>         | 1.385                                                       | 1.596                                                       |
| μ /mm <sup>-1</sup>                         | 2.132                                                       | 1.199                                                       |
| F(000)                                      | 544.0                                                       | 696.0                                                       |
| Crystal size/mm <sup>3</sup>                | 0.4 × 0.3 × 0.2                                             | 0.3 × 0.3 × 0.3                                             |
| Radiation                                   | Cu Kα (λ = 1.54184)                                         | CuKα (λ = 1.54184)                                          |
| 2θ range for data collection                | 7.262 to 134.064                                            | 9.206 to 134.136°                                           |
| Index ranges                                | -27 ≤ h ≤ 29,                                               | -10 ≤ h ≤ 14,                                               |
|                                             | -6 ≤ k ≤ 10,                                                | -18 ≤ k ≤ 16,                                               |
|                                             | -7 ≤ l ≤ 7                                                  | -8 ≤ l ≤ 9                                                  |
| Reflections collected                       | 7392                                                        | 9117                                                        |
|                                             | 2231                                                        | 2484                                                        |
| Independent reflections                     | [R <sub>int</sub> = 0.0221,<br>R <sub>sigma</sub> = 0.0202] | [R <sub>int</sub> = 0.0196,<br>R <sub>sigma</sub> = 0.0173] |
| Data/restraints/parameters                  | 2231/1/216                                                  | 2484/1/226                                                  |
| Goodness-of-fit on F <sup>2</sup>           | 1.075                                                       | 1.064                                                       |
| Final R indexes [I ≥ 2σ (I)]                | R <sub>1</sub> = 0.0265,                                    | R <sub>1</sub> = 0.0266,                                    |
|                                             | wR <sub>2</sub> = 0.0687                                    | wR <sub>2</sub> = 0.0677                                    |
| Final R indexes [all data]                  | R <sub>1</sub> = 0.0274,                                    | R <sub>1</sub> = 0.0271,                                    |
|                                             | wR <sub>2</sub> = 0.0698                                    | wR <sub>2</sub> = 0.0685                                    |
| Largest diff. peak/hole / e Å <sup>-3</sup> | 0.12/-0.20                                                  | 0.11/-0.19                                                  |
| Flack parameter                             | -0.003(11)                                                  | 0.03(4)                                                     |

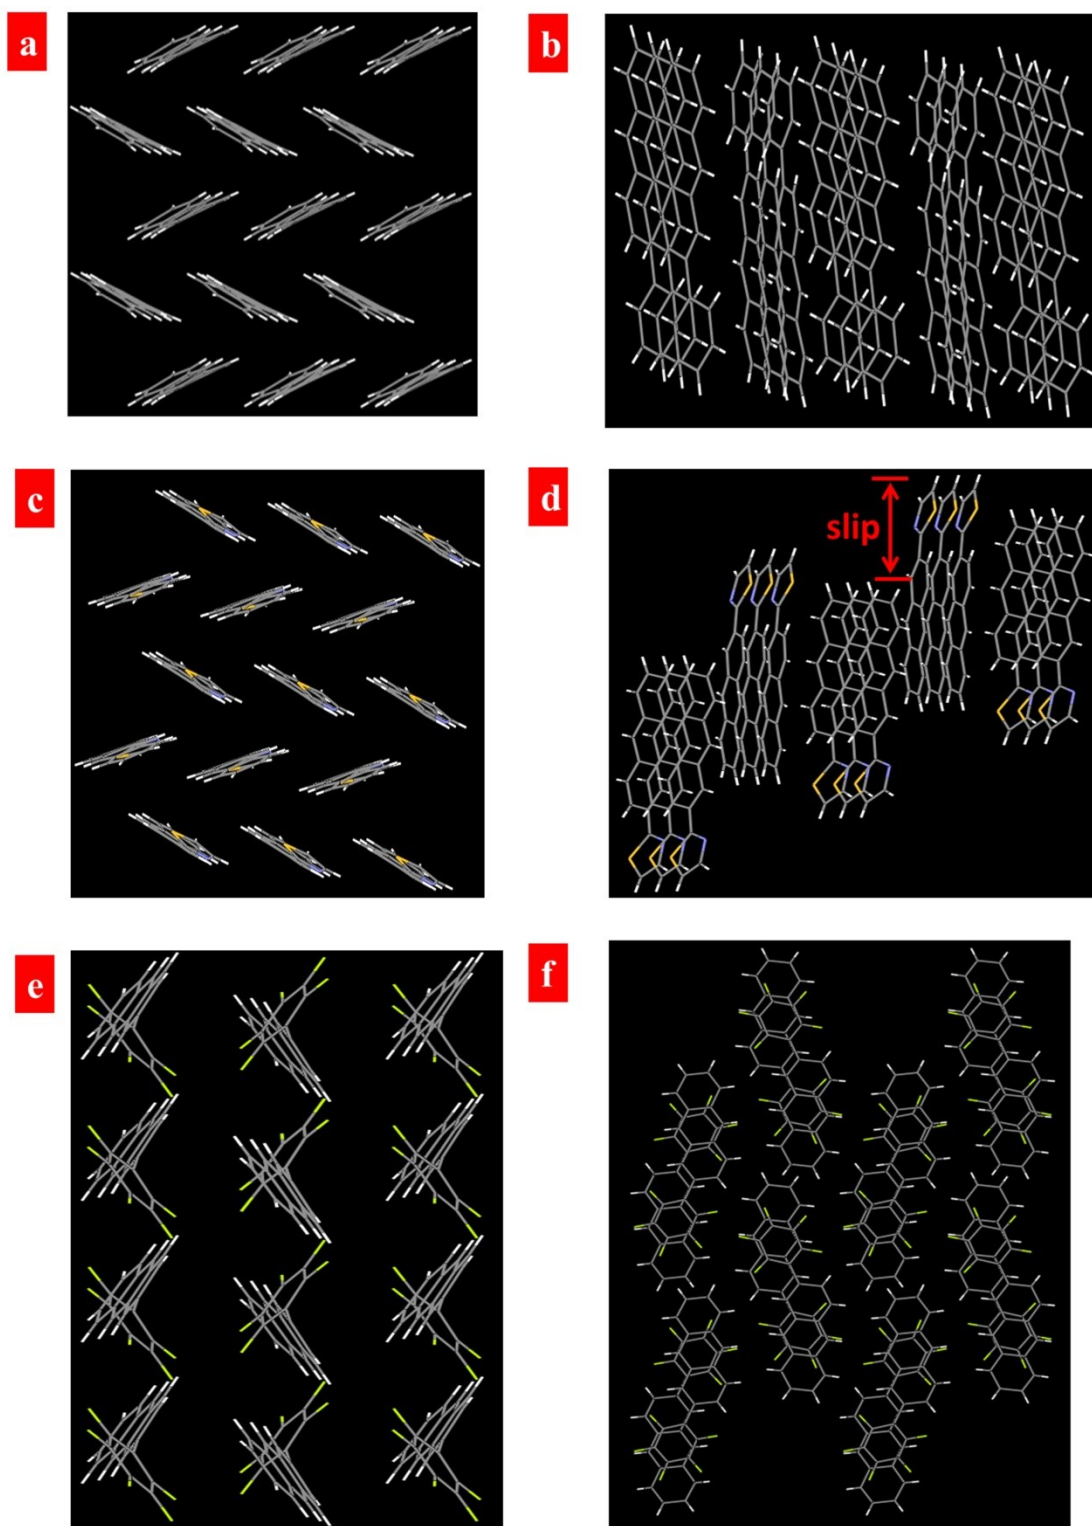

**Figure S1** Comparison of molecular packing for Ph-Ant(a,b), TZ-Ant(c,d) and F<sub>5</sub>Ph-Ant(e,f).

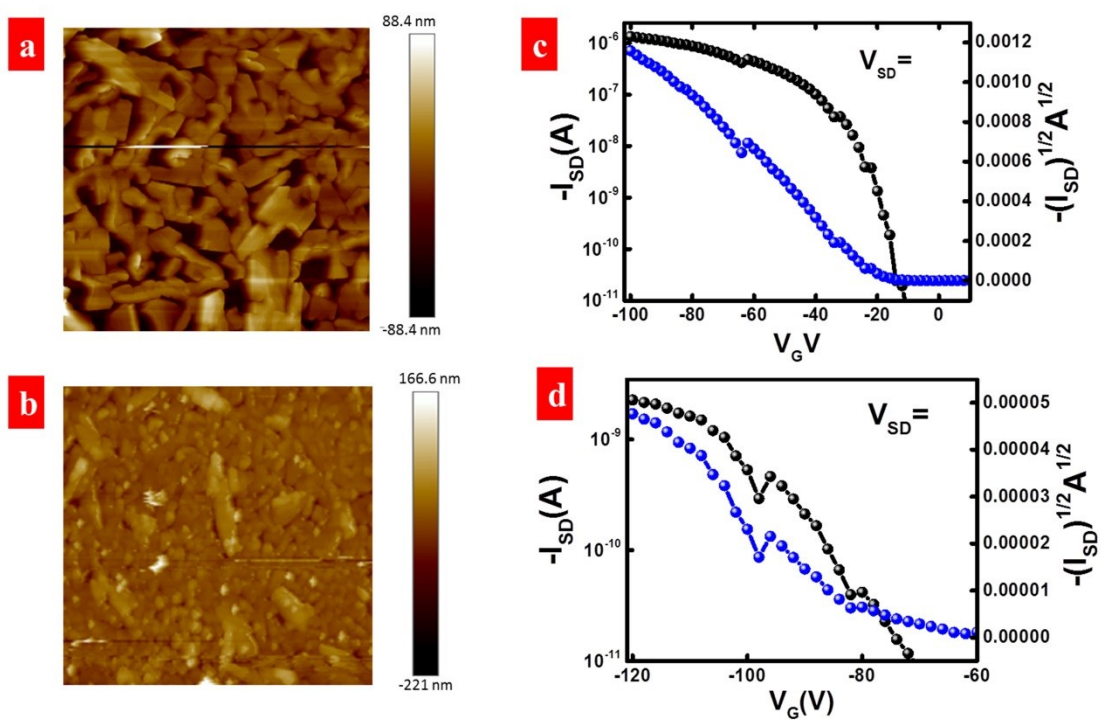

**Figure S2.** Atomic force microscopy image of a thin film of Ph-Ant (a) and TZ-Ant (b) in the tapping mode and transfer characteristics of devices based on Ph-Ant (c) and TZ-Ant (d)

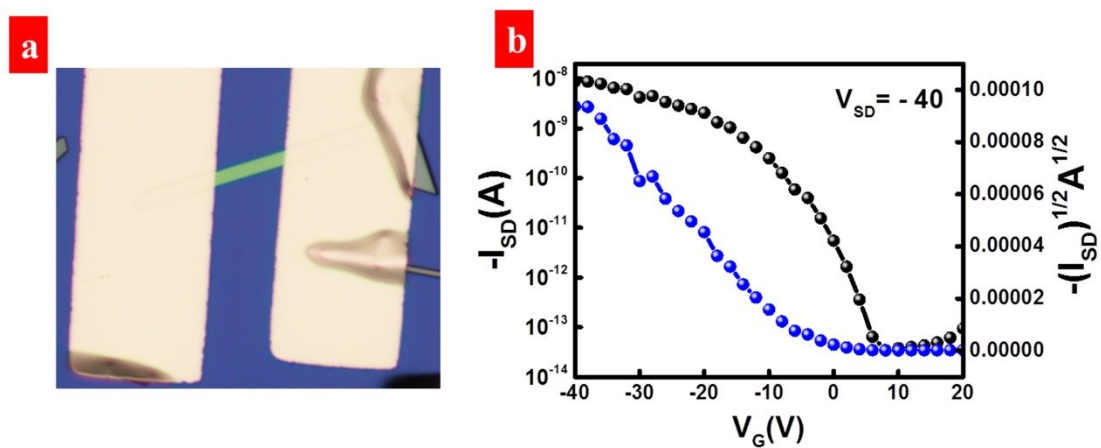

**Figure S3.** Single crystal based transistor of TZ-Ant and transfer characteristics of devices based on TZ-Ant
